# Supplementary material
Source: publisher figshare collection journal article supplement (https://acs.figshare.com/ndownloader/files/4029979)
Supplement: Supplementary file 1 [file 4029979]

# Agreement of Land Use Regression models with personal exposure measurements of particulate matter and nitrogen oxides air pollution

Denise Montagne<sup>1)</sup>, Gerard Hoek<sup>1,\*</sup>, Mark Nieuwenhuijsen<sup>2)</sup>, Timo Lanki<sup>3)</sup>, Arto Pennanen<sup>3)</sup>, Meritxell Portella<sup>2)</sup>, Kees Meliefste<sup>1)</sup>, Marloes Eeftens<sup>1)</sup>, Tarja Yli-Tuomi<sup>3)</sup>, Marta Cirach Pradas<sup>2)</sup>, Bert Brunekreef<sup>1,4)</sup>

<sup>1)</sup> Institute for Risk Assessment Sciences (IRAS), University of Utrecht, Utrecht, the Netherlands

<sup>2)</sup> Center for Research in Environmental Epidemiology (CREAL), Barcelona, Spain

<sup>3)</sup> Department of Environmental Health, National Institute for Health and Welfare (THL), Kuopio, Finland

<sup>4)</sup> Julius Center for Health Sciences and Primary Care, University Medical Center, University of Utrecht, Utrecht, the Netherlands

## Contents

|                                                                                                                                                                                                                                                                                   |    |
|-----------------------------------------------------------------------------------------------------------------------------------------------------------------------------------------------------------------------------------------------------------------------------------|----|
| Supporting Information 1: LUR models .....                                                                                                                                                                                                                                        | 3  |
| Table S1 ESCAPE Land Use Regression models for PM2.5 and Soot (Eeftens et al. 2012) .....                                                                                                                                                                                         | 3  |
| Table S2 ESCAPE Land Use Regression models for NO2 and NOx (Beelen et al. 2013) .....                                                                                                                                                                                             | 4  |
| Supporting Information 2: Temporal adjustment .....                                                                                                                                                                                                                               | 6  |
| Table S3 Formula's for the imputation of missing values on the reference site .....                                                                                                                                                                                               | 7  |
| Table S4 The median slopes ( $\beta$ ) per country of the within person (or temporal) relation between the outdoor measurements and the personal/indoor measurements. ....                                                                                                        | 8  |
| Table S5 The median correlation coefficients (R) of the association between the home outdoor measurements and the personal/indoor measurements per participant, per city .....                                                                                                    | 8  |
| Table S6 Median correlation coefficients (R) of the outdoor measurements versus the measurements at the reference site (including the imputed values) per ID .....                                                                                                                | 8  |
| Table S7 The correlation of the corrected mean versus the uncorrected mean concentrations. ....                                                                                                                                                                                   | 10 |
| Supporting Information 3: Modeled PM2.5, NO2, NO <sub>x</sub> and measured personal soot .....                                                                                                                                                                                    | 11 |
| Table S8 The coefficient of determination ( $R^2$ ), the regression coefficient ( $\beta$ ), the intercept ( $\alpha$ ) and the p-value (p) of the regression analysis of the ESCAPE measured soot concentrations versus the mean modeled PM2.5, NO2 and NOx concentrations. .... | 11 |
| Supporting Information 4: Site description .....                                                                                                                                                                                                                                  | 12 |
| Table S9 Distribution of home characteristics .....                                                                                                                                                                                                                               | 12 |

|                                                                                                                                                                                                                                                                                                                                                                                                                    |    |
|--------------------------------------------------------------------------------------------------------------------------------------------------------------------------------------------------------------------------------------------------------------------------------------------------------------------------------------------------------------------------------------------------------------------|----|
| .....                                                                                                                                                                                                                                                                                                                                                                                                              | 12 |
| Figure S1 Maps of the VE3SPA sites in Helsinki (top left), Barcelona (top right) and Utrecht (bottom left). .....                                                                                                                                                                                                                                                                                                  | 14 |
| Supporting Information 5: Quality assurance, quality control .....                                                                                                                                                                                                                                                                                                                                                 | 15 |
| Table S10 Field blanks and detection limit for PM2.5 ( $\mu\text{g}/\text{m}^3$ ), soot reflectance , NO2 and NO ( $\mu\text{g}/\text{m}^3$ ).....                                                                                                                                                                                                                                                                 | 15 |
| Table S11 Number of included samples below the detection limit.....                                                                                                                                                                                                                                                                                                                                                | 16 |
| Table S12 Duplicate measurements .....                                                                                                                                                                                                                                                                                                                                                                             | 16 |
| Supporting Information 6: Scatterplots modeled versus measured concentrations.....                                                                                                                                                                                                                                                                                                                                 | 17 |
| Figure S2 Regression plots of the corrected measured average versus modeled concentration for NO2 and NOx in Utrecht, Helsinki and Barcelona .....                                                                                                                                                                                                                                                                 | 17 |
| Supporting Information 7: Associations of modeled and measured concentrations using an alternative adjustment method for temporal variation .....                                                                                                                                                                                                                                                                  | 19 |
| Table S13 The coefficient of determination ( $R^2$ ), the regression coefficient of the reference site ( $\beta_r$ ) the regression coefficient of the modeled concentrations ( $\beta_m$ ) and the intercept ( $\alpha$ ) of the regression analysis of the ESCAPE modeled concentrations versus the mean measured VE3SPA concentrations, with the measurements at the reference site included in the model ..... | 20 |
| Supporting Information 8: Environmental Tobacco Smoke.....                                                                                                                                                                                                                                                                                                                                                         | 22 |
| Table S14 Regression analyses of the modeled outdoor versus the measured indoor/personal concentrations, the measurements with environmental tobacco smoke (ETS) are excluded from analysis. Only participants with more than one measurement are included. ....                                                                                                                                                   | 22 |
| Supporting Information 9: Leave one out cross-validation .....                                                                                                                                                                                                                                                                                                                                                     | 23 |
| Table S15 The minimum (MIN), maximum(MAX) and standard deviation (STD) of the R squares derived from the leave one out cross validation. N=15, for the 15 models where N-1=14 participants.....                                                                                                                                                                                                                    | 23 |
| References .....                                                                                                                                                                                                                                                                                                                                                                                                   | 24 |

## Supporting Information 1: LUR models

**Table S1** ESCAPE Land Use Regression models for PM<sub>2.5</sub> and Soot (Eeftens et al. 2012)

| Study area              | LUR model <sup>1</sup>                                                                                                                            | R <sup>2</sup> of model | R <sup>2</sup> validation | RMSE <sup>2</sup> (validation) (µg/m <sup>3</sup> ) | Number of sites <sup>3</sup> | Measured concentration (µg/m <sup>3</sup> ) <sup>4</sup> |
|-------------------------|---------------------------------------------------------------------------------------------------------------------------------------------------|-------------------------|---------------------------|-----------------------------------------------------|------------------------------|----------------------------------------------------------|
| <i>PM<sub>2.5</sub></i> |                                                                                                                                                   |                         |                           |                                                     |                              |                                                          |
| Helsinki/Turku, Finland | $9.25 - 6.75E-6 * NATURAL\_500^4 + 6.34E-7 * TRAFMAJORLOAD\_50$                                                                                   | 67%                     | 53%                       | 1.0                                                 | 20                           | 8.6 [5.3 – 12.3]                                         |
| Netherlands/Belgium     | $9.46 + 0.42 * REGIONALESTIMATE + 0.01 * MAJORROADLENGTH\_50 + 2.28E-9 * TRAFMAJORLOAD\_1000$                                                     | 67%                     | 61%                       | 1.2                                                 | 40                           | 17.7 [12.7 – 21.5]                                       |
| Barcelona, Spain        | $16.21 - 4.08E-6 * GREEN\_1000 + 2.04E-7 * TRAFLOAD\_100 + 6.82E-3 * INTINVDIST2$                                                                 | 83%                     | 71%                       | 2.1                                                 | 20                           | 16.3 [8.4 – 24.4]                                        |
| <i>Soot</i>             |                                                                                                                                                   |                         |                           |                                                     |                              |                                                          |
| Helsinki/Turku, Finland | $1.15 + 2.09E-7 * TRAFLOAD\_50 - 1.15E-6 * NATURAL\_500^4$                                                                                        | 65%                     | 47%                       | 0.3                                                 | 20                           | 1.1 [0.6 – 2.3]                                          |
| Netherlands/Belgium     | $0.07 + 2.95E-9 * TRAFLOAD\_500 + 2.93E-3 * MAJORROADLENGTH\_50 + 0.85 * REGIONALESTIMATE + 7.90E-9 * HLDRES\_5000 + 1.72E-6 * HEAVYTRAFLOAD\_50$ | 92%                     | 89%                       | 0.2                                                 | 40                           | 1.7 [0.9 – 3.0]                                          |
| Barcelona, Spain        | $1.01 + 7.46E-6 * HDRES\_300 + 2.66E-3 * INTINVDIST2 + 1.11E-7 * TRAFLOAD\_50$                                                                    | 86%                     | 80%                       | 0.4                                                 | 20                           | 2.7 [0.9 – 4.9]                                          |

1 Most variables are buffers with \_xxx indicating the size of the buffer in m (e.g. HHOLD\_500 is the number of households in a 500m buffer). TRAFLOAD is traffic intensity \* length of road in a buffer. HDRES and LDRES are high and low density residential land use. INTINVDIST is product of traffic intensity and inverse distance to the nearest road. SQRALT is square root of altitude. Major road as road classes 0, 1 and 2 (motorways, main roads of major importance and other main roads) from the central road network or roads with more than 5,000 vehicles/day based upon local networks with linked traffic intensity. INTINVDIST is traffic intensity multiplied by inverse distance (squared).

2 RMSE is the root mean square error, which can be interpreted as the “average” residual (difference between observed and modeled concentration)

3 Number of sites that have been used for model development.

4 Mean [min - max]. Units are 10<sup>-5</sup>m<sup>-1</sup> for soot.

**Table S2** ESCAPE Land Use Regression models for NO<sub>2</sub> and NO<sub>x</sub> (Beelen et al. 2013)

| Study area                  | LUR model <sup>1</sup>                                                                                                                                                                   | R <sup>2</sup> of model | R <sup>2</sup> validation | RMSE <sup>2</sup> (validation) (µg/m <sup>3</sup> ) | Number of sites <sup>3</sup> | Measured concentration (µg/m <sup>3</sup> ) <sup>4</sup> |
|-----------------------------|------------------------------------------------------------------------------------------------------------------------------------------------------------------------------------------|-------------------------|---------------------------|-----------------------------------------------------|------------------------------|----------------------------------------------------------|
| <i>NO<sub>2</sub></i>       |                                                                                                                                                                                          |                         |                           |                                                     |                              |                                                          |
| Helsinki and Turku, Finland | $7.61 + 1.18E-5*TRAFLOAD\_25 + 3.43E-8*TRAFLOAD\_25\_1000 + 0.04*ROADLENGTH\_25 + 1.24E-3*ROADLENGTH\_25\_300 - 9.18E-5*URBGREEN\_5004$                                                  | 83%                     | 75%                       | 3.4                                                 | 40                           | 18.9 [6.1 – 40.8]                                        |
| Netherlands and Belgium     | $-7.80 + 1.18*REGIONALESTIMATE + 2.30E-5*POP\_5000 + 2.46E-6*TRAFLOAD\_50 + 1.06E-4*ROADLENGTH\_1000 + 9.84E-5*HEAVYTRAFLOAD\_25 + 12.19*DISTINVNEARC1 + 4.47E-7*HEAVYTRAFLOAD\_25\_500$ | 86%                     | 81%                       | 5.1                                                 | 80                           | 30.9 [12.8 – 61.5]                                       |
| Barcelona, Spain            | $3.16 + 6.26E-3*INTINVDIST1 + 1.18E-4*HDRES\_300 + 992.09*DISTINVMAJOR2 + 3.51E-4*ROADLENGTH\_1000$                                                                                      | 75%                     | 68%                       | 11.6                                                | 40                           | 57.7 [13.8 – 109.0]                                      |
| <i>NO<sub>x</sub></i>       |                                                                                                                                                                                          |                         |                           |                                                     |                              |                                                          |
| Helsinki and Turku, Finland | $12.56 + 3.46E-5*TRAFLOAD\_25 + 4.92E-8*TRAFLOAD\_25\_1000 + 1.70E-2*ROADLENGTH\_100 - 5.58E-5*URBGREEN\_10004 + 2.54E-3*HHOLD\_300$                                                     | 85%                     | 74%                       | 7.8                                                 | 40                           | 30.6 [8.6 – 94.7]                                        |
| Netherlands and Belgium     | $3.25 + 0.74*REGIONALESTIMATE + 4.22E-6*TRAFLOAD\_50 + 6.36E-4*POP\_1000 + 2.39E-6*HEAVYTRAFLOAD\_500 + 71.65*DISTINVMAJOR1 + 0.21*MAJORROADLENGTH\_25$                                  | 87%                     | 82%                       | 11.2                                                | 80                           | 51.8 [17.5 – 130.8]                                      |
| Barcelona, Spain            | $32.85 + 2.55E-4*HDRES\_300 + 2815.14*DISTINVMAJOR2 + 3.87E-5*TRAFLOAD\_25$                                                                                                              | 73%                     | 65%                       | 27.7                                                | 40                           | 101.3 [21.0 – 236.4]                                     |

---

1 Most variables are buffers with \_xxx indicating the size of the buffer in m (e.g. HHOLD\_500 is the number of households in a 500m buffer). TRAFLOAD is traffic intensity\*length of road in a buffer. HDRES and LDRES are high and low density residential land use. INTINVDIST is product of traffic intensity and inverse distance to the nearest road. SQRALT is square root of altitude. Major road as road classes 0, 1 and 2 (motorways, main roads of major importance and other main roads) from the central road network or roads with more than 5,000 vehicles/day based upon local networks with linked traffic intensity. INTINVDIST is traffic intensity multiplied by inverse distance (squared). DISTINVMAJOR is inverse distance to a major road.

2 RMSE is the root mean square error, which can be interpreted as the “average” residual (difference between observed and modeled concentration)

3 Number of sites that have been used for model development.

4 Mean [min - max]

## Supporting Information 2: Temporal adjustment

In the Netherlands, measurements were done in 32 weeks (2 extra weeks were scheduled to replace some missing data). During two of these measuring weeks, data from the reference site were missing because of technical failure. In Spain, the number of measuring weeks was 30. Out of these 30 weeks, 7 had missing data at the reference site. Four missing measurements occurred because no units were available and three because of technical failure.

For the missing measurements on the reference site in Spain and the Netherlands, imputation was applied. The measurements on the reference site were compared to measurements at fixed monitoring sites from the RIVM ('Rijksinstituut voor Volksgezondheid en Milieu', the National institute for Public Health and the Environment) in the Netherlands and the National Network in Barcelona (Gencat, Generalitat de Catalunya). The regression formula comparing the VE<sup>3</sup>SPA reference site with the fixed site was used to calculate the concentrations for the missing data (Table S3).

In the Netherlands, the  $R^2$  of soot on the VE<sup>3</sup>SPA reference site compared to black smoke on site 738 of the RIVM was 0.70. NO<sub>2</sub> and NO<sub>x</sub> also correlated best with site 738 and had a  $R^2$  of 0.61 and 0.73 respectively. For PM<sub>2.5</sub> the best correlation ( $R^2=0.69$ ) was with the PM<sub>10</sub> concentration on site 633 of the RIVM. In Spain, the VE<sup>3</sup>SPA PM<sub>2.5</sub> concentrations at the reference site correlated with a  $R^2$  of 0.66 with the PM<sub>10</sub> (better than with PM<sub>2.5</sub>) measured at the IES Verdaguer site (Gencat). The NO<sub>2</sub> concentration at Hospitalet was used for the imputation of NO<sub>2</sub>, the  $R^2$  was 0.64. For NO<sub>x</sub> the concentrations of NO<sub>2</sub> and NO at the Hospitalet site were combined. This correlated with an  $R^2$  of 0.75 with the VE<sup>3</sup>SPA NO<sub>x</sub> measurements. The NO<sub>x</sub> concentrations were also used for the imputation of soot because soot was not available in the network, the  $R^2$  was 0.61.

**Table S3** Formula's for the imputation of missing values on the reference site.

| Country | Comp              | Independent comp, site       | n  | $\alpha$ | $\beta$ | Formula <sup>1</sup> | R <sup>2</sup> |
|---------|-------------------|------------------------------|----|----------|---------|----------------------|----------------|
| NL      | Soot              | BS, 738                      | 28 | 0,27     | 0,12    | Vref=0.27+0.12*F     | 0,70           |
| NL      | PM <sub>2.5</sub> | PM <sub>2.5</sub> , 633      | 29 | -3,78    | 0,78    | Vref=-3,78+0,78*F    | 0,69           |
| NL      | NO <sub>2</sub>   | NO <sub>2</sub> , 738        | 30 | 5,82     | 0,95    | Vref=5,82+0,95*F     | 0,61           |
| NL      | NO <sub>x</sub>   | NO <sub>x</sub> , 738        | 30 | 1,73     | 1,51    | Vref=1,73+1,51*F     | 0,73           |
| Spain   | PM <sub>2.5</sub> | PM <sub>10</sub> , Verdaguer | 20 | -10,08   | 0,85    | Vref=-10,08+0,85*F   | 0,66           |
| Spain   | Soot              | NO <sub>x</sub> , Hospitalet | 22 | -0,06    | 0,03    | Vref=-0,06+0,03*F    | 0,61           |
| Spain   | NO <sub>2</sub>   | NO <sub>2</sub> , Hospitalet | 24 | -0,16    | 1,21    | Vref=-0,16+1,21*F    | 0,64           |
| Spain   | NO <sub>x</sub>   | NO <sub>x</sub> , Hospitalet | 24 | 6,96     | 1,26    | Vref=6,96+1,26*F     | 0,71           |

The imputed component (comp) and the independent component with the name or number of the fixed monitor site, the number of measurements in the linear regression (n), the intercept ( $\alpha$ ), the Beta ( $\beta$ ) and the R<sup>2</sup> are given and entered in the imputation formula. Note: Black Smoke and soot are different methods for Black Carbon determination.

1 Vref is the VE3SPA reference site and F is the fixed reference site

The median slopes that were used for the temporal adjustment of the indoor and personal measurements per country are shown (Table S4). The slopes were consistent across the three countries and were all smaller than 1. This makes the influence of the adjustment with the reference site less, which is plausible for the indoor and personal measurements. The median correlation coefficients (R) of these regressions are shown in Table S5.

**Table S4** The median slopes ( $\beta$ ) per country of the within person (or temporal) relation between the outdoor measurements and the personal/indoor measurements.

| <b>Correlation <math>\beta</math></b>        | <b>Finland</b> |             | <b>Netherlands</b> |             | <b>Spain</b>  |             |
|----------------------------------------------|----------------|-------------|--------------------|-------------|---------------|-------------|
| <b>Component</b>                             | <b>indoor</b>  | <b>pers</b> | <b>indoor</b>      | <b>pers</b> | <b>indoor</b> | <b>pers</b> |
| Soot (10-5/m)                                | 0,49           | 0,42        | 0,68               | 0,66        | 0,62          | 0,40        |
| PM2.5 ( $\mu\text{g}/\text{m}^3$ )           | 0,38           | 0,60        | 0,41               | 0,44        | 0,59          | 0,64        |
| NO <sub>2</sub> ( $\mu\text{g}/\text{m}^3$ ) | 0,11           | 0,35        | 0,29               | 0,37        | 0,20          | 0,25        |
| NO <sub>x</sub> ( $\mu\text{g}/\text{m}^3$ ) | 0,65           | 0,80        | 0,44               | 0,75        | 0,88          | 0,60        |

**Table S5** The median correlation coefficients (R) of the association between the home outdoor measurements and the personal/indoor measurements per participant, per city

| <b>Component</b>  | <b>Helsinki</b> |             | <b>Utrecht</b> |             | <b>Barcelona</b> |             |
|-------------------|-----------------|-------------|----------------|-------------|------------------|-------------|
|                   | <b>indoor</b>   | <b>pers</b> | <b>indoor</b>  | <b>pers</b> | <b>indoor</b>    | <b>pers</b> |
| PM <sub>2.5</sub> | 0.51            | 0.67        | 0.82           | 0.71        | 0.79             | 0.41        |
| Soot              | 0.79            | 0.72        | 0.95           | 0.89        | 0.81             | 0.67        |
| NO <sub>2</sub>   | 0.25            | 0.77        | 0.57           | 0.77        | 0.48             | 0.43        |
| NO <sub>x</sub>   | 0.85            | 0.91        | 0.84           | 0.85        | 0.95             | 0.86        |

\*All correlation coefficients were statistically significant ( $p < 0.05$ )

**Table S6** Median correlation coefficients (R) of the outdoor measurements versus the measurements at the reference site (including the imputed values) per ID

| <b>Median Correlation</b>                    | <b>Finland</b> | <b>Netherlands</b> | <b>Spain</b> |
|----------------------------------------------|----------------|--------------------|--------------|
| <b>Component</b>                             | <b>ref</b>     | <b>ref</b>         | <b>ref</b>   |
| Soot (10-5/m)                                | 0,90           | 0,88               | 0,72         |
| PM2.5 ( $\mu\text{g}/\text{m}^3$ )           | 0,88           | 0,92               | 0,79         |
| NO <sub>2</sub> ( $\mu\text{g}/\text{m}^3$ ) | 0,97           | 0,92               | 0,89         |
| NO <sub>x</sub> ( $\mu\text{g}/\text{m}^3$ ) | 0,95           | 0,93               | 0,86         |



After imputing the missing measurements at the reference site, the measurements at the reference site were plotted against the outdoor measurements per participant to show the temporal association of the measurements at the reference site and the outdoor concentrations at the participant address. The median correlation coefficients are shown in Table S6. For most of the volunteers in the three countries, the reference site was well able to predict the temporal fluctuation of the outdoor measurements at the home addresses, the median correlation coefficients in Finland and the Netherlands were very good. This supports the use of the reference site to correct for temporal variability. In Spain, the median correlation coefficients were lower for especially soot and PM<sub>2.5</sub>, but still good. If only the non-imputed measurements at the reference site are plotted, the median correlation coefficients for Spain are a bit higher for soot (0.78) and lower (0.73) for PM<sub>2.5</sub>. This indicates that the reference site in Spain was less predictive for the temporal fluctuations at the sites, which was not explained by the larger number of imputed values.

The corrected mean concentrations correlated well with the uncorrected mean of the measurements (Table S7). The correlation of the corrected and uncorrected mean was less for PM<sub>2.5</sub> than for the other components, as observed in the ESCAPE project.<sup>1, 2</sup> This was explained by the authors by the observation that the measured PM<sub>2.5</sub> concentration had lower seasonal variability and were more dependent on the weather, resulting in larger within season variability. Therefore the uncorrected mean could deviate more from the corrected mean.<sup>1</sup>

The outdoor corrected measurements had lower correlations with the uncorrected measurements than the indoor and personal measurements. This was a result of the procedure in which for the outdoor measurements we directly subtracted the differences at the reference site, while we used the difference multiplied by an indoor/outdoor slope ( $<1$ ) for the indoor and personal measurements.

**Table S7** The correlation of the corrected mean versus the uncorrected mean concentrations.

| <b>PM2.5</b> | <b>Outdoor<br/>R<sup>2</sup></b> | <b>Indoor<br/>R<sup>2</sup></b> | <b>Personal<br/>R<sup>2</sup></b> |
|--------------|----------------------------------|---------------------------------|-----------------------------------|
| Netherlands  | 0,40                             | 0,96                            | 0,85                              |
| Finland      | 0,26                             | 0,99                            | 0,86                              |
| Spain        | 0,41                             | 0,77                            | 0,85                              |
| <b>Soot</b>  | <b>Outdoor<br/>R<sup>2</sup></b> | <b>Indoor<br/>R<sup>2</sup></b> | <b>Personal<br/>R<sup>2</sup></b> |
| Netherlands  | 0,93                             | 0,89                            | 0,81                              |
| Finland      | 0,81                             | 0,99                            | 0,98                              |
| Spain        | 0,69                             | 0,81                            | 0,87                              |
| <b>NO2</b>   | <b>Outdoor<br/>R<sup>2</sup></b> | <b>Indoor<br/>R<sup>2</sup></b> | <b>Personal<br/>R<sup>2</sup></b> |
| Netherlands  | 0,95                             | 0,99                            | 0,97                              |
| Finland      | 0,81                             | 1,00                            | 0,98                              |
| Spain        | 0,88                             | 0,99                            | 0,97                              |
| <b>NOx</b>   | <b>Outdoor<br/>R<sup>2</sup></b> | <b>Indoor<br/>R<sup>2</sup></b> | <b>Personal<br/>R<sup>2</sup></b> |
| Netherlands  | 0,96                             | 1,00                            | 0,97                              |
| Finland      | 0,82                             | 0,99                            | 0,98                              |
| Spain        | 0,91                             | 0,85                            | 0,87                              |

## Supporting Information 3: Modeled PM<sub>2.5</sub>, NO<sub>2</sub>, NO<sub>x</sub> and measured personal soot

In Table S8 the associations of the measured soot concentrations with the modeled personal PM<sub>2.5</sub>, NO<sub>2</sub> and NO<sub>x</sub> concentrations are shown. Associations are usually stronger than with the personal exposure of the component itself.

**Table S8** The coefficient of determination ( $R^2$ ), the regression coefficient ( $\beta$ ), the intercept ( $\alpha$ ) and the p-value ( $p$ ) of the regression analysis of the ESCAPE measured soot concentrations versus the mean modeled PM<sub>2.5</sub>, NO<sub>2</sub> and NO<sub>x</sub> concentrations.

| Helsinki          |                |         |          |      |
|-------------------|----------------|---------|----------|------|
| Model             | R <sup>2</sup> | $\beta$ | $\alpha$ | p    |
| PM <sub>2.5</sub> | 0.29           | 0.29    | -1.68    | 0.04 |
| NO <sub>2</sub>   | 0.47           | 0.04    | 0.01     | 0.00 |
| NO <sub>x</sub>   | 0.49           | 0.02    | 0.16     | 0.00 |
| Utrecht           |                |         |          |      |
| Model             | R <sup>2</sup> | $\beta$ | $\alpha$ | p    |
| PM <sub>2.5</sub> | 0.32           | 0.09    | -0.44    | 0.03 |
| NO <sub>2</sub>   | 0.60           | 0.02    | 0.46     | 0.00 |
| NO <sub>x</sub>   | 0.55           | 0.01    | 0.61     | 0.00 |
| Barcelona         |                |         |          |      |
| Model             | R <sup>2</sup> | $\beta$ | $\alpha$ | p    |
| PM <sub>2.5</sub> | 0.00           | 0.01    | 2.00     | 0.81 |
| NO <sub>2</sub>   | 0.16           | 0.01    | 1.42     | 0.15 |
| NO <sub>x</sub>   | 0.21           | 0.00    | 1.64     | 0.08 |

## Supporting Information 4: Site description

**Table S9** Distribution of home characteristics

|                                                       |                          | <b>Utrecht</b> | <b>Barcelona</b> | <b>Helsinki</b> |
|-------------------------------------------------------|--------------------------|----------------|------------------|-----------------|
| <b>Traffic intensity</b><br>(veh.day <sup>-1</sup> )* | Traffic site             | 16805 (5066)   | 21722 (9840)     | 18675(13886)    |
|                                                       | Urban background         | 1511 (1660)    | 10254 (7386)     | 1053 (747)      |
|                                                       | Semi-urban background    | 542 (453)      | 1040 (721)       | 867 (1770)      |
| <b>Sampling height</b><br>(m)*                        | Traffic site             | 3.3 (7.2)      | 5.2 (4.1)        | 15.4 (9.2)      |
|                                                       | Urban background         | 4.3 (0.8)      | 6.4 (3.4)        | 10.8 (6.6)      |
|                                                       | Semi-urban background    | 4.4 (3.3)      | 9.4 (4.9)        | 2.4 (1.4)       |
| <b>House type</b>                                     | Detached family home     | 0              | 0                | 2               |
|                                                       | Attached family home     | 11             | 0                | 2               |
|                                                       | Flat/apartment           | 4              | 15               | 11              |
| <b>Home volume</b>                                    | <100 m <sup>3</sup>      | 0              | 3                | 3               |
|                                                       | 100-200 m <sup>3</sup>   | 6              | 8                | 6               |
|                                                       | 200-300 m <sup>3</sup>   | 5              | 2                | 4               |
|                                                       | >300 m <sup>3</sup>      | 4              | 2                | 2               |
| <b>Built</b>                                          | 1800-1944                | 8              | 3                | 2               |
|                                                       | 1945-1979                | 5              | 10               | 8               |
|                                                       | >1980                    | 2              | 2                | 5               |
| <b>Type kitchen is open (n (%))</b>                   |                          | 9 (60)         | 0 (0)            | 6 (40)          |
| <b>Air conditioning (n)</b>                           |                          | 1 (6.7)        | 8 (53)           | 0 (0)           |
| <b>Heating</b>                                        | Central in home          | 11             | 2                | 1               |
|                                                       | District                 | 1              | 0                | 11              |
|                                                       | Separate gas/oil heaters | 3              | 6                | 0               |
|                                                       | Electric                 | 0              | 4                | 3               |

|                             |                                     |         |         |         |
|-----------------------------|-------------------------------------|---------|---------|---------|
|                             | No heating                          | 0       | 3       | 0       |
| <b>Cooking on gas (n %)</b> |                                     | 12 (80) | 14 (93) | 1 (6.7) |
| <b>Living room on</b>       | Ground level                        | 6       | 0       | 6       |
|                             | First floor                         | 6       | 8       | 3       |
|                             | >2nd floor                          | 3       | 7       | 6       |
| <b>Fume hood</b>            | No fume hood                        | 5       | 5       | 3       |
|                             | Exhaust air recirculated            | 2       | 0       | 3       |
|                             | With external vent ( <i>n</i> (%))  | 8       | 10      | 9       |
| <b>Pet in home</b>          | Cat                                 | 6       | 0       | 3       |
|                             | Dog                                 | 4       | 1       | 3       |
|                             | Other                               | 5       | 1       | 1       |
| <b>Floor cover</b>          | Smooth                              | 9       | 10      | 6       |
|                             | Carpet                              | 2       | 4       | 0       |
|                             | Rug (larger than 1 m <sup>3</sup> ) | 4       | 1       | 9       |

\* Mean (standard deviation). Traffic counted manually (van Roosbroeck, 2007)

**Figure S1** Maps of the VE3SPA sites in Helsinki (top left), Barcelona (top right) and Utrecht (bottom left).

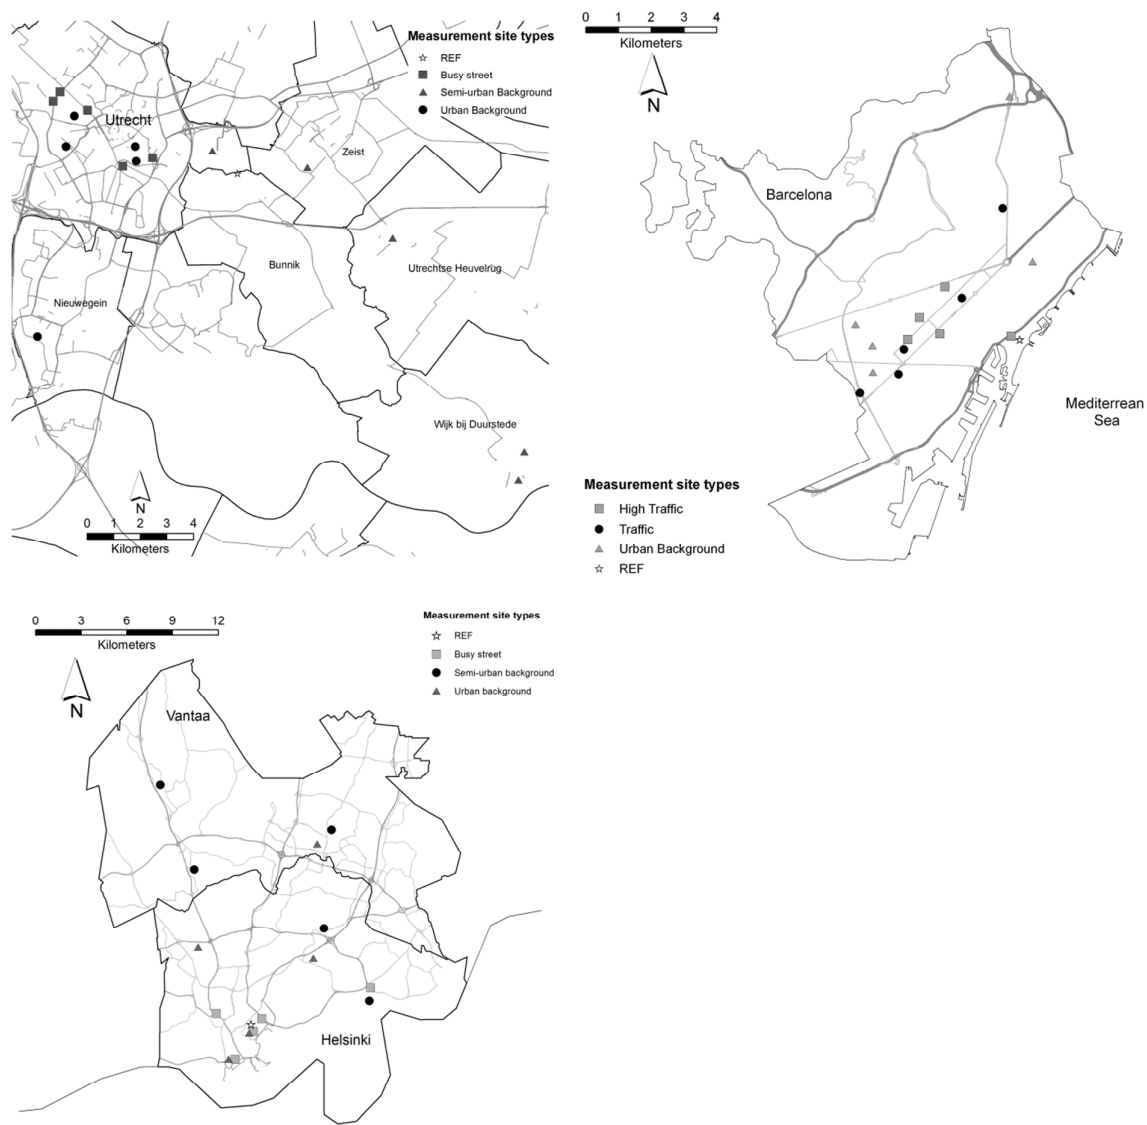

## Supporting Information 5: Quality assurance, quality control

Table S10 describes the results of the field blanks that were collected. Overall, the field blanks were low, although there were a few blank PM<sub>2.5</sub> measurements that had quite high negative values. It could be that while transporting the filters to the filter cassette, a small part of the support filter was shipped off. This was not noted by the field worker and thus the blank was still included in the analyses.

The soot measurements were all above the detection limit (DL), most PM<sub>2.5</sub> and NO<sub>2</sub> as well (Table S11).

The measurements that were below the detection limit are nonetheless included in the analysis. Finland had the most measurements under the detection limit, because of the overall low concentrations in Finland (section 6.2.6).

The results of the duplicate measurements are described in Table S12. Most coefficients of variation are about 10% which is acceptable. The CV for PM<sub>2.5</sub> is larger for the Netherlands than for Finland and Spain. For some of the duplicate measurements a pump unit was used that had given some technical problems in the past. The best units were used for the actual measurements. The coefficient of variance (CV) for PM<sub>2.5</sub> of 21.63% in the Netherlands thus likely gives an upper estimate of the uncertainty. A CV value of 10% in individual measurements translates into a CV of the average (based upon six measurements) of about 4% (10% /  $\sqrt{6}$ ). A CV value of 20% in individual measurements translates into a CV of the average (based upon six measurements) of about 8% (20% /  $\sqrt{6}$ ). Because of the small number of personal duplicates for PM<sub>2.5</sub>, soot and NO<sub>2</sub>, these CV values are less interpretable.

**Table S10** Field blanks and detection limit for PM<sub>2.5</sub> (µg/m<sup>3</sup>), soot reflectance, NO<sub>2</sub> and NO (µg/m<sup>3</sup>)

| Study area | N field blanks    |                 | Average field blank    |       |                      |                      | Detection limit                        |                                          |                                      |                                      |
|------------|-------------------|-----------------|------------------------|-------|----------------------|----------------------|----------------------------------------|------------------------------------------|--------------------------------------|--------------------------------------|
|            | PM <sub>2.5</sub> | NO <sub>x</sub> | PM <sub>2.5</sub> (µg) | Soot* | NO <sub>2</sub> (µg) | NO <sub>x</sub> (µg) | PM <sub>2.5</sub> (µg/m <sup>3</sup> ) | Soot (10 <sup>-5</sup> m <sup>-1</sup> ) | NO <sub>2</sub> (µg/m <sup>3</sup> ) | NO <sub>x</sub> (µg/m <sup>3</sup> ) |
| Utrecht    | 15                | 13              | 0.00                   | 102.7 | -0.01                | 0.99                 | 1.22                                   | 0.12                                     | 2.1                                  | 12.0                                 |
| Helsinki   | 16                | 17              | 0.00                   | 101.9 | 0.51                 | 1.24                 | 2.35*<br>*                             | 0.11                                     | 5.8                                  | 5.8                                  |
| Barcelona  | 15                | 13              | 0.01                   | 102.3 | 0.54                 | 1.75                 | 5.17†                                  | 0.13                                     | 1.9                                  | 4.3                                  |

\*this is the R0 in the formula for the absorption coefficient that can be found on page 11.

\*\* When the sample of S13 8-10-2010 (filter 10756) was excluded, the detection limit was 1.15 µg/m<sup>3</sup>

† When the sample of F113 at 6-12-2010 (filter 10534) was excluded, the detection limit was 0.73 µg/m<sup>3</sup>

**Table S11** Number of included samples below the detection limit.

| Study area | measurements (n)  |      |                 |                 |
|------------|-------------------|------|-----------------|-----------------|
|            | PM <sub>2.5</sub> | Soot | NO <sub>2</sub> | NO <sub>x</sub> |
| Utrecht    | 1                 | 0    | 0               | 7               |
| Helsinki   | 16*               | 0    | 5               | 8               |
| Barcelona  | 8*                | 0    | 1               | 0               |

\* When the Blank filters 10756 and 10534 were excluded from the detection limit calculations, none of the filters were below detection limit.

**Table S12** Duplicate measurements

| Study area                | n duplicates            |                 | CV (%)            |        |                 |                 |
|---------------------------|-------------------------|-----------------|-------------------|--------|-----------------|-----------------|
|                           | PM <sub>2.5</sub> /soot | NO <sub>x</sub> | PM <sub>2.5</sub> | Soot   | NO <sub>2</sub> | NO <sub>x</sub> |
| Outdoor/Indoor Duplicates |                         |                 |                   |        |                 |                 |
| Utrecht                   | 13                      | 17              | 21,6%             | 11,1%  | 9,0%            | 10,2%           |
| Helsinki                  | 15                      | 14              | 11,5%             | 12,6%  | 9,0%            | 8,3%            |
| Barcelona                 | 15                      | 5               | 9,2%              | 6,8%   | 20,3%           | 5,7%            |
| Personal Duplicates       |                         |                 |                   |        |                 |                 |
| Utrecht                   | 4                       | 5               | 7,7%*             | 21,8%* | 4,7%            | 3,0%            |
| Helsinki                  | 5                       | 5               | 9,2%              | 7,5%   | 6,6%            | 26,7%†          |
| Barcelona                 | 5                       | 3               | 40,8%**           | 27,6%  | 4,4%            | 7,4%            |

\*if we don't include volunteer N16, the Dutch CV would be 2.31% for PM<sub>2.5</sub> and 7.10% for Soot.

\*\* If we don't include the personal duplicate measurement of volunteer S19 than the CV would be 23,65% for PM<sub>2.5</sub>

†9.1% if not including volunteer F994



## Supporting Information 6: Scatterplots modeled versus measured concentrations

**Figure S2** Regression plots of the corrected measured average versus modeled concentration for NO<sub>2</sub> and NO<sub>x</sub> in Utrecht, Helsinki and Barcelona

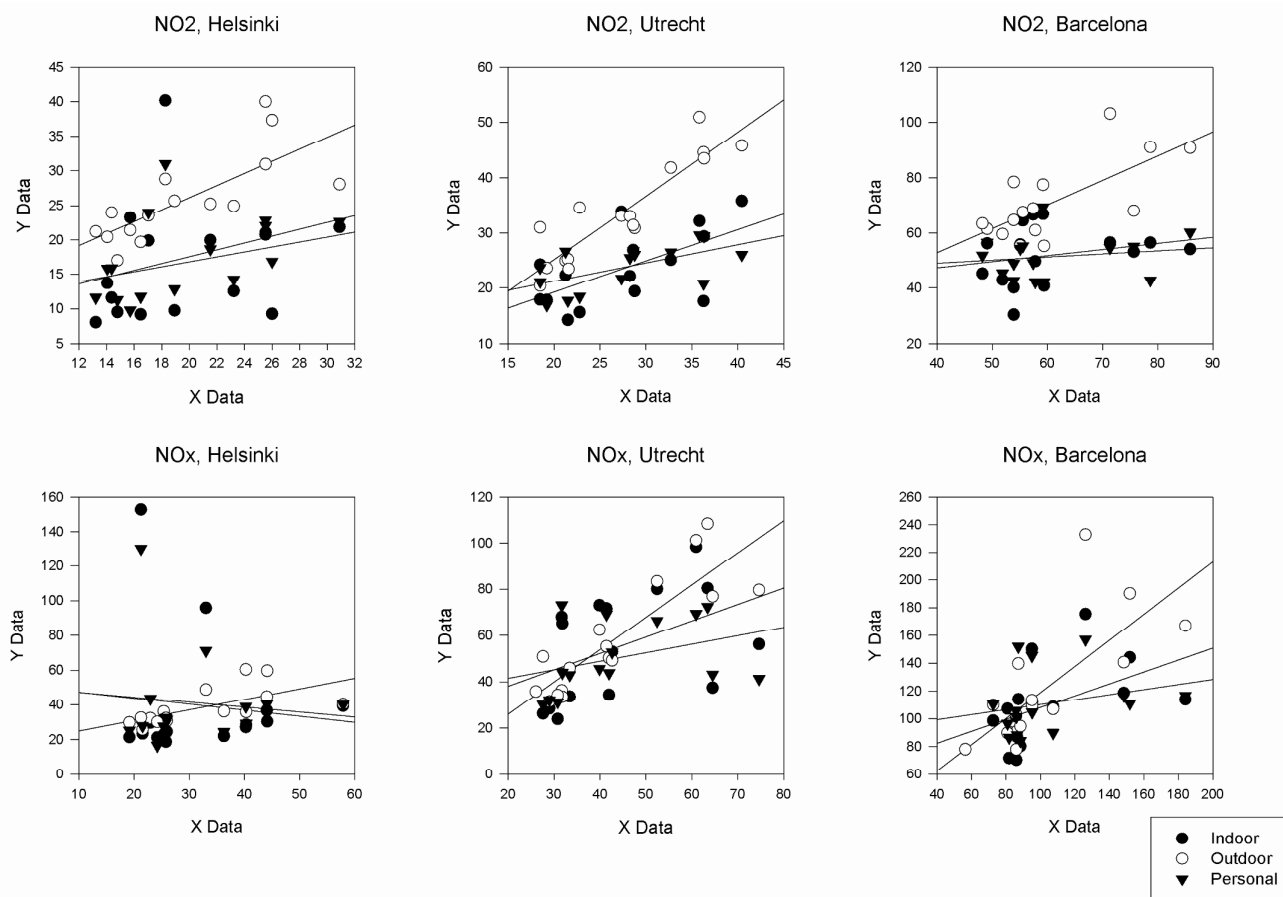

**Figure S3** Regression of the pooled data set of the three countries.

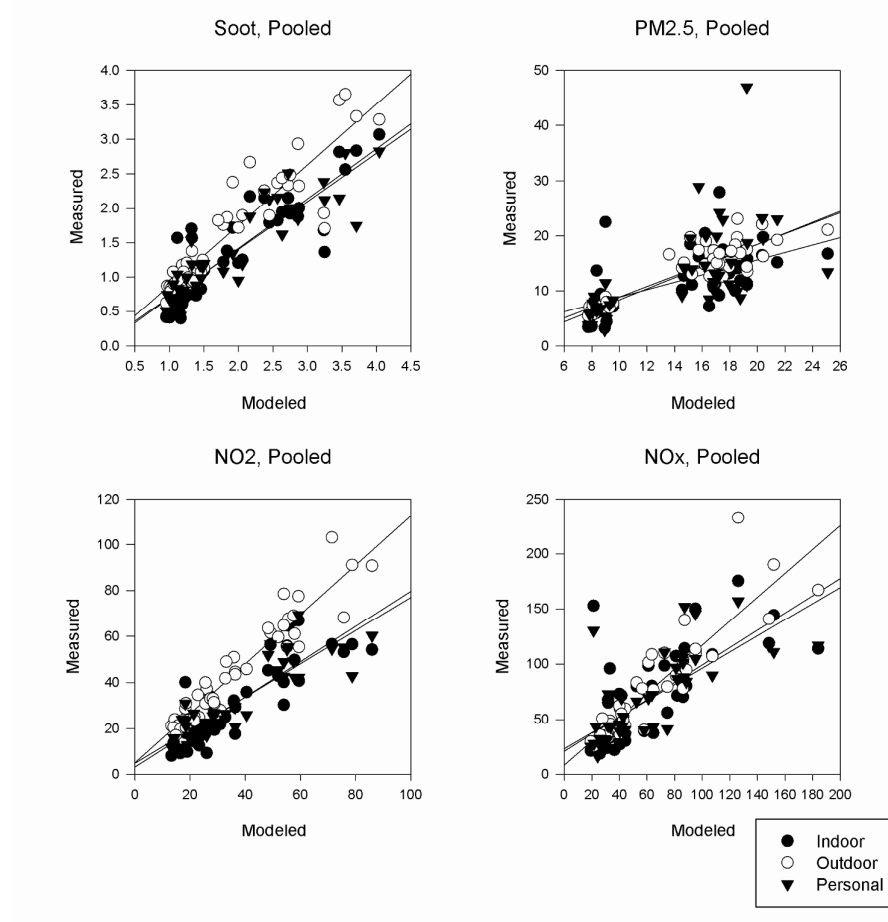

## **Supporting Information 7: Associations of modeled and measured concentrations using an alternative adjustment method for temporal variation**

When the concentrations were corrected by including the measurements at the reference site in the model, the results were comparable with the absolute differences correction method (Table S13). The p-values for the modeled concentrations (pm) show the probability that adding the modeled concentrations in the regression model is significant. With this method, the outdoor NO<sub>x</sub> in Finland is not significant anymore. Also with the reference site included in the model, we see that the models significantly predict the outdoor concentrations of soot, NO<sub>2</sub> and NO<sub>x</sub> in the three countries. Table S13 shows that the indoor NO<sub>x</sub> for the Netherlands and Spain was significant when including the reference site in the model. With the absolute differences method, these associations were borderline significant. No associations were found with personal exposure.

**Table S13** The coefficient of determination ( $R^2$ ), the regression coefficient of the reference site ( $\beta_r$ ) the regression coefficient of the modeled concentrations ( $\beta_m$ ) and the intercept ( $\alpha$ ) of the regression analysis of the ESCAPE modeled concentrations versus the mean measured VE3SPA concentrations, with the measurements at the reference site included in the model

| <b>PM2.5</b> | <b>Outdoor</b> |                             |                             |                            | <b>Indoor</b> |                             |                             |                            | <b>Personal</b> |                             |                             |                            |
|--------------|----------------|-----------------------------|-----------------------------|----------------------------|---------------|-----------------------------|-----------------------------|----------------------------|-----------------|-----------------------------|-----------------------------|----------------------------|
|              | <b>R2</b>      | <b><math>\beta_r</math></b> | <b><math>\beta_m</math></b> | <b><math>\alpha</math></b> | <b>R2</b>     | <b><math>\beta_r</math></b> | <b><math>\beta_m</math></b> | <b><math>\alpha</math></b> | <b>R2</b>       | <b><math>\beta_r</math></b> | <b><math>\beta_m</math></b> | <b><math>\alpha</math></b> |
| Netherlands  | 0,66           | 0,86*                       | 1,08*                       | -13,88                     | 0,57          | 1,37*                       | 0,32                        | -10,94                     | 0,35            | 0,62*                       | -0,39                       | 10,12                      |
| Finland      | 0,78           | 0,93*                       | 0,61                        | -4,88                      | 0,23          | 1,44                        | 1,34                        | -14,08                     | 0,21            | 0,46                        | 1,14                        | -6,61                      |
| Spain        | 0,57           | 0,84*                       | 0,23                        | -0,79                      | 0,06          | 0,27                        | 0,00                        | 11,86                      | 0,06            | 0,64                        | -0,34                       | 18,43                      |
| <b>Soot</b>  | <b>Outdoor</b> |                             |                             |                            | <b>Indoor</b> |                             |                             |                            | <b>Personal</b> |                             |                             |                            |
|              | <b>R2</b>      | <b><math>\beta_r</math></b> | <b><math>\beta_m</math></b> | <b><math>\alpha</math></b> | <b>R2</b>     | <b><math>\beta_r</math></b> | <b><math>\beta_m</math></b> | <b><math>\alpha</math></b> | <b>R2</b>       | <b><math>\beta_r</math></b> | <b><math>\beta_m</math></b> | <b><math>\alpha</math></b> |
| Netherlands  | 0,83           | 1,60*                       | 1,16*                       | -1,92                      | 0,81          | 1,39*                       | 0,65*                       | -1,24                      | 0,68            | 1,03*                       | 0,37*                       | -0,48                      |
| Finland      | 0,60           | 1,26*                       | 0,94*                       | -1,22                      | 0,41          | 1,84                        | 1,93*                       | -2,99                      | 0,47            | 1,13                        | 1,45*                       | -1,86                      |
| Spain        | 0,67           | -0,02                       | 0,90*                       | 0,01                       | 0,61          | -0,07                       | 0,72*                       | 0,16                       | 0,49            | 0,53†                       | 0,28                        | 0,38                       |
| <b>NO2</b>   | <b>Outdoor</b> |                             |                             |                            | <b>Indoor</b> |                             |                             |                            | <b>Personal</b> |                             |                             |                            |
|              | <b>R2</b>      | <b><math>\beta_r</math></b> | <b><math>\beta_m</math></b> | <b><math>\alpha</math></b> | <b>R2</b>     | <b><math>\beta_r</math></b> | <b><math>\beta_m</math></b> | <b><math>\alpha</math></b> | <b>R2</b>       | <b><math>\beta_r</math></b> | <b><math>\beta_m</math></b> | <b><math>\alpha</math></b> |
| Netherlands  | 0,89           | 1,84*                       | 1,08*                       | -39,08                     | 0,57          | 1,38*                       | 0,52*                       | -23,28                     | 0,58            | 1,01*                       | 0,30*                       | -8,45                      |
| Finland      | 0,51           | 0,87                        | 0,80*                       | -14,60                     | 0,09          | 0,59                        | 0,31                        | -5,78                      | 0,28            | 0,58                        | 0,47                        | -7,81                      |
| Spain        | 0,67           | -0,23                       | 1,05*                       | 20,27                      | 0,11          | 0,45                        | 0,19                        | 16,85                      | 0,10            | -0,36                       | 0,20                        | 58,37                      |
| <b>NOx</b>   | <b>Outdoor</b> |                             |                             |                            | <b>Indoor</b> |                             |                             |                            | <b>Personal</b> |                             |                             |                            |
|              | <b>R2</b>      | <b><math>\beta_r</math></b> | <b><math>\beta_m</math></b> | <b><math>\alpha</math></b> | <b>R2</b>     | <b><math>\beta_r</math></b> | <b><math>\beta_m</math></b> | <b><math>\alpha</math></b> | <b>R2</b>       | <b><math>\beta_r</math></b> | <b><math>\beta_m</math></b> | <b><math>\alpha</math></b> |
| Netherlands  | 0,87           | 2,49*                       | 1,36*                       | -89,87                     | 0,76          | 3,67*                       | 0,61*                       | -104,27                    | 0,65            | 2,63*                       | 0,30                        | -57,34                     |
| Finland      | 0,41           | 1,28†                       | 0,49†                       | -28,28                     | 0,11          | 2,54                        | -0,31                       | -48,15                     | 0,13            | 2,09                        | -0,28                       | -30,44                     |
| Spain        | 0,58           | 0,12                        | 1,01*                       | 9,67                       | 0,31          | 0,22                        | 0,48†                       | 43,59                      | 0,14            | -0,22                       | 0,25                        | 104,39                     |

Concentrations are corrected for weather differences using the inclusion of the reference site in the regression analysis method.  $\beta_r$  reflects temporal variation.  $\beta_m$  the spatial component. The  $R^2$  cannot be compared with Table 4 from the main paper.

\* Significant at the  $p < 0.05$  level

† Significant at the  $p < 0.10$  level

**P values Table S13**

| <b>PM2.5</b> | <b>Outdoor</b> |           | <b>Indoor</b> |           | <b>Personal</b> |           |
|--------------|----------------|-----------|---------------|-----------|-----------------|-----------|
|              | <b>pr</b>      | <b>pm</b> | <b>pr</b>     | <b>pm</b> | <b>pr</b>       | <b>pm</b> |
| Netherlands  | 0,002          | 0,011     | 0,002         | 0,589     | 0,037           | 0,394     |
| Finland      | 0,000          | 0,182     | 0,131         | 0,584     | 0,274           | 0,315     |
| Spain        | 0,002          | 0,380     | 0,393         | 0,996     | 0,435           | 0,707     |
| <b>Soot</b>  | <b>Outdoor</b> |           | <b>Indoor</b> |           | <b>Personal</b> |           |
|              | <b>pr</b>      | <b>pm</b> | <b>pr</b>     | <b>pm</b> | <b>pr</b>       | <b>pm</b> |
| Netherlands  | 0,004          | 0,000     | 0,001         | 0,000     | 0,004           | 0,008     |
| Finland      | 0,011          | 0,007     | 0,120         | 0,026     | 0,136           | 0,012     |
| Spain        | 0,946          | 0,001     | 0,799         | 0,002     | 0,060           | 0,136     |
| <b>NO2</b>   | <b>Outdoor</b> |           | <b>Indoor</b> |           | <b>Personal</b> |           |
|              | <b>pr</b>      | <b>pm</b> | <b>pr</b>     | <b>pm</b> | <b>pr</b>       | <b>pm</b> |
| Netherlands  | 0,001          | 0,000     | 0,030         | 0,017     | 0,015           | 0,026     |
| Finland      | 0,153          | 0,018     | 0,510         | 0,500     | 0,333           | 0,132     |
| Spain        | 0,646          | 0,000     | 0,474         | 0,501     | 0,424           | 0,310     |
| <b>NOx</b>   | <b>Outdoor</b> |           | <b>Indoor</b> |           | <b>Personal</b> |           |
|              | <b>pr</b>      | <b>pm</b> | <b>pr</b>     | <b>pm</b> | <b>pr</b>       | <b>pm</b> |
| Netherlands  | 0,000          | 0,000     | 0,000         | 0,027     | 0,001           | 0,179     |
| Finland      | 0,055          | 0,071     | 0,263         | 0,734     | 0,233           | 0,691     |
| Spain        | 0,858          | 0,002     | 0,690         | 0,052     | 0,637           | 0,201     |

## Supporting Information 8: Environmental Tobacco Smoke

**Table S14** Regression analyses of the modeled outdoor versus the measured indoor/personal concentrations, the measurements with environmental tobacco smoke (ETS) are excluded from analysis. Only participants with more than one measurement are included.

| ETS excluded from analyses |        |                |       |       |      |          |                |       |        |      |
|----------------------------|--------|----------------|-------|-------|------|----------|----------------|-------|--------|------|
| PM2.5                      | Indoor |                |       |       |      | Personal |                |       |        |      |
| Country                    | N      | R <sup>2</sup> | β     | α     | p    | N        | R <sup>2</sup> | β     | α      | p    |
| Netherlands                | 15     | 0,01           | 0,31  | 6,74  | 0,67 | 15       | 0,07           | -0,39 | 18,18  | 0,35 |
| Finland                    | 15     | 0,04           | 1,90  | -8,36 | 0,45 | 15       | 0,03           | 0,85  | -0,58  | 0,51 |
| Spain                      | 13     | 0,00           | 0,08  | 14,96 | 0,86 | 13       | 0,01           | -0,31 | 28,26  | 0,76 |
| Soot                       | Indoor |                |       |       |      | Personal |                |       |        |      |
| Country                    | N      | R <sup>2</sup> | β     | α     | p    | N        | R <sup>2</sup> | β     | α      | p    |
| Netherlands                | 15     | 0,64           | 0,63  | 0,10  | 0,00 | 15       | 0,42           | 0,35  | 0,50   | 0,01 |
| Finland                    | 15     | 0,30           | 1,83  | -1,29 | 0,04 | 15       | 0,38           | 1,34  | -0,75  | 0,01 |
| Spain                      | 13     | 0,35           | 0,49  | 0,69  | 0,03 | 13       | 0,14           | 0,25  | 1,42   | 0,21 |
| NO2                        | Indoor |                |       |       |      | Personal |                |       |        |      |
| Country                    | N      | R <sup>2</sup> | β     | α     | p    | N        | R <sup>2</sup> | β     | α      | p    |
| Netherlands                | 15     | 0,34           | 0,56  | 8,22  | 0,02 | 15       | 0,27           | 0,27  | 16,09  | 0,05 |
| Finland                    | 15     | 0,02           | 0,23  | 13,16 | 0,65 | 15       | 0,18           | 0,49  | 7,60   | 0,12 |
| Spain                      | 15     | 0,11           | 0,32  | 31,27 | 0,23 | 15       | 0,03           | 0,14  | 42,81  | 0,54 |
| NOx                        | Indoor |                |       |       |      | Personal |                |       |        |      |
| Country                    | N      | R <sup>2</sup> | β     | α     | p    | N        | R <sup>2</sup> | β     | α      | p    |
| Netherlands                | 15     | 0,12           | 0,53  | 30,80 | 0,21 | 15       | 0,05           | 0,23  | 39,32  | 0,42 |
| Finland                    | 15     | 0,01           | -0,33 | 50,54 | 0,72 | 15       | 0,01           | -0,25 | 48,74  | 0,72 |
| Spain                      | 15     | 0,17           | 0,40  | 67,87 | 0,13 | 15       | 0,01           | 0,10  | 101,20 | 0,67 |

The number of participants included in the analysis (N), the coefficient of determination (R<sup>2</sup>), the regression coefficient (β), the intercept (α) and the p-value (p) of the model.

## Supporting Information 9: Leave one out cross-validation

**Table S15** The minimum (MIN), maximum(MAX) and standard deviation (STD) of the R squares derived from the leave one out cross validation. N=15, for the 15 models where N-1=14 participants.

|           |      | Outdoor Soot  | Outdoor PM <sub>2.5</sub>  | Outdoor NO <sub>2</sub>  | Outdoor NOx  |
|-----------|------|---------------|----------------------------|--------------------------|--------------|
| Helsinki  | MIN  | 0.50          | 0.12                       | 0.50                     | 0.36         |
|           | MAX  | 0.68          | 0.28                       | 0.71                     | 0.62         |
|           | MEAN | 0.57          | 0.21                       | 0.56                     | 0.42         |
|           | STD  | 0.04          | 0.05                       | 0.05                     | 0.06         |
| Utrecht   | MIN  | 0.72          | 0.37                       | 0.79                     | 0.72         |
|           | MAX  | 0.80          | 0.54                       | 0.87                     | 0.83         |
|           | MEAN | 0.75          | 0.43                       | 0.82                     | 0.75         |
|           | STD  | 0.02          | 0.05                       | 0.02                     | 0.03         |
| Barcelona | MIN  | 0.26          | 0.02                       | 0.41                     | 0.42         |
|           | MAX  | 0.49          | 0.17                       | 0.60                     | 0.68         |
|           | MEAN | 0.33          | 0.10                       | 0.49                     | 0.51         |
|           | STD  | 0.06          | 0.04                       | 0.05                     | 0.06         |
|           |      | Personal Soot | Personal PM <sub>2.5</sub> | Personal NO <sub>2</sub> | Personal NOx |
| Utrecht   | MIN  | 0.37          | 0.01                       | 0.28                     | 0.07         |
|           | MAX  | 0.61          | 0.28                       | 0.50                     | 0.30         |
|           | MEAN | 0.44          | 0.07                       | 0.35                     | 0.14         |
|           | STD  | 0.06          | 0.06                       | 0.06                     | 0.07         |
| Barcelona | MIN  | 0.05          | 0.00                       | 0.00                     | 0.04         |
|           | MAX  | 0.42          | 0.06                       | 0.12                     | 0.14         |
|           | MEAN | 0.20          | 0.01                       | 0.03                     | 0.07         |
|           | STD  | 0.08          | 0.02                       | 0.03                     | 0.03         |
| Helsinki  | MIN  | 0.28          | 0.03                       | 0.15                     | 0.01         |
|           | MAX  | 0.45          | 0.17                       | 0.40                     | 0.08         |
|           | MEAN | 0.39          | 0.08                       | 0.21                     | 0.02         |
|           | STD  | 0.05          | 0.04                       | 0.06                     | 0.02         |

## References

1. Eeftens, M.; Tsai, M.; Ampe, C.; Anwander, B.; Beelen, R. Spatial variation of PM<sub>2.5</sub>, PM<sub>10</sub>, PM<sub>2.5</sub> absorbance and PM<sub>coarse</sub> concentrations between and within 20 European study areas and the relationship with NO<sub>2</sub> - Results of the ESCAPE project. *Atmospheric Environment* **2012**, 62, 303-317.
2. Eeftens, M.; Beelen, R.; de Hoogh, K., et al Development of Land Use Regression models for PM(2.5), PM(2.5) absorbance, PM(10) and PM(coarse) in 20 European study areas; results of the ESCAPE project. *Environ. Sci. Technol.* **2012**, 46, 11195-11205.
